# Supplementary material for: Periprosthetic Fungal Infections in Severe Endoprosthetic Infections of the Hip and Knee Joint—A Retrospective Analysis of a Certified Arthroplasty Centre of Excellence
Source: MDPI journal article supplement (doi:10.3390/jof7060404), 2021-05-21
Supplement: s1 [file s1]

## Supplementary

**Table S1.** Relation of choice of antifungal agents to main outcome.

| Outcome   |            | Antifungal drug          |                            |                           | p-Value<br>(chi-square) |
|-----------|------------|--------------------------|----------------------------|---------------------------|-------------------------|
| Infection | cured      | Fluconazole<br>4 (66.7%) | Anidulafungin<br>2 (66.7%) | Caspofungin<br>3 (100.0%) | 0.361                   |
|           | persistent | 2 (33.3%)                | 1 (33.3%)                  | 0 (0.0%)                  |                         |
